# Supplementary material for: Greenland Ice Sheet seasonal and spatial mass variability from model simulations and GRACE (2003–2012)
Source: Copernicus journal article supplement (doi:10.5194/tc-10-1259-2016), 2016-06-20
Supplement: Supplementary file 1 [file tc-10-1259-2016-supplement.pdf]

Supplement of The Cryosphere, 10, 1259–1277, 2016  
<http://www.the-cryosphere.net/10/1259/2016/>  
doi:10.5194/tc-10-1259-2016-supplement  
© Author(s) 2016. CC Attribution 3.0 License.

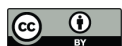

*Supplement of*

## **Greenland Ice Sheet seasonal and spatial mass variability from model simulations and GRACE (2003–2012)**

**Patrick M. Alexander et al.**

*Correspondence to:* P. M. Alexander ([patrick.m.alexander@nasa.gov](mailto:patrick.m.alexander@nasa.gov))

The copyright of individual parts of the supplement might differ from the CC-BY 3.0 licence.

Table S1. Timing of the seasonal cycle maximum and minimum for cumulative mass change (January 2003 – December 2012) for GRACE-LM, MAR v3.5.2, ISSM forced by MAR v3.5.2, and MAR v3.5.2 + ISSM, within the different regions of the ice sheet defined in Figure 12a, as well as the high (above 2000 m) and low (below 2000 m) elevation regions defined in Figure 1a. The 2.5 % and 97.5% bounds and median value for GRACE-LM are provided.

|                   | < 2000 m | >2000 m | Reg 1  | Reg 2  | Reg 3  | Reg 4  | Reg 5  | Reg 6  | Reg 7  | Reg 8  | Reg 9  |
|-------------------|----------|---------|--------|--------|--------|--------|--------|--------|--------|--------|--------|
| Maximum:          |          |         |        |        |        |        |        |        |        |        |        |
| GRACE (2.5 %)     | 22 Mar   | 20 Feb  | 7 Dec  | 7 Dec  | 21 Jan | 20 Jun | 11 Apr | 2 Mar  | 18 Oct | 28 Sep | 11 Jan |
| GRACE median      | 21 Apr   | 22 Mar  | 27 Dec | 21 Jan | 1 Apr  | 30 Jun | 11 May | 11 Apr | 20 Feb | 11 Jan | 10 Feb |
| GRACE (97.5%)     | 31 May   | 21 Apr  | 11 Jan | 11 Apr | 1 May  | 10 Jul | 31 May | 21 May | 1 Apr  | 2 Mar  | 11 Apr |
| MAR v3.5.2        | 30 Apr   | 11 May  | 30 Apr | 30 Apr | 30 Apr | 10 May | 21 Apr | 30 Apr | 21 May | 21 May | 30 Apr |
| MAR v3.5.2 + ISSM | 21 Apr   | 10 May  | 30 Apr | 30 Apr | 30 Apr | 10 May | 21 Apr | 30 Apr | 21 May | 11 May | 30 Apr |
| ISSM              | 21 Oct   | 1 Oct   | 10 Oct | 10 Oct | 1 Oct  | 1 Oct  | 21 Oct | 10 Oct | 1 Oct  | 10 Sep | 1 Oct  |
| Minimum:          |          |         |        |        |        |        |        |        |        |        |        |
| GRACE (2.5 %)     | 29 Aug   | 19 Aug  | 30 Jul | 30 Jul | 20 Jul | 19 Aug | 8 Sep  | 29 Aug | 1 May  | 21 Apr | 10 Jul |
| GRACE median      | 18 Sep   | 18 Sep  | 19 Aug | 19 Aug | 29 Aug | 18 Sep | 8 Oct  | 28 Sep | 21 May | 21 May | 30 Jul |
| GRACE (97.5%)     | 28 Oct   | 27 Nov  | 8 Oct  | 8 Sep  | 28 Sep | 18 Oct | 28 Oct | 17 Nov | 30 Jul | 9 Aug  | 18 Sep |
| MAR v3.5.2        | 30 Sep   | 31 Aug  | 20 Sep | 21 Sep | 20 Sep | 20 Sep | 1 Oct  | 20 Sep | 21 Aug | 11 Aug | 10 Sep |
| MAR v3.5.2 + ISSM | 30 Sep   | 31 Aug  | 20 Sep | 20 Sep | 20 Sep | 20 Sep | 1 Oct  | 20 Sep | 21 Aug | 11 Aug | 10 Sep |
| ISSM              | 1 Jun    | 20 Jun  | 21 May | 21 May | 1 Jun  | 22 May | 31 May | 10 Jun | 1 Jun  | 1 Jun  | 1 Jun  |

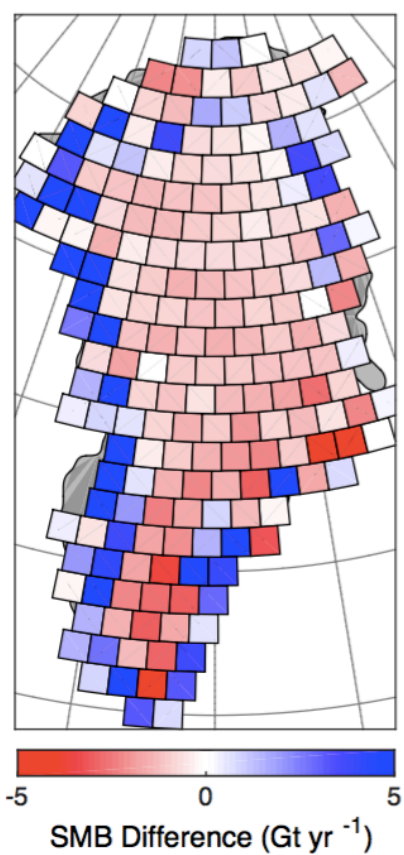

Figure S1. MAR v3.5.2 – MAR v2.0 average SMB, aggregated to the GRACE-LM grid, with no filtering applied, for the period January 2003 – December 2010.

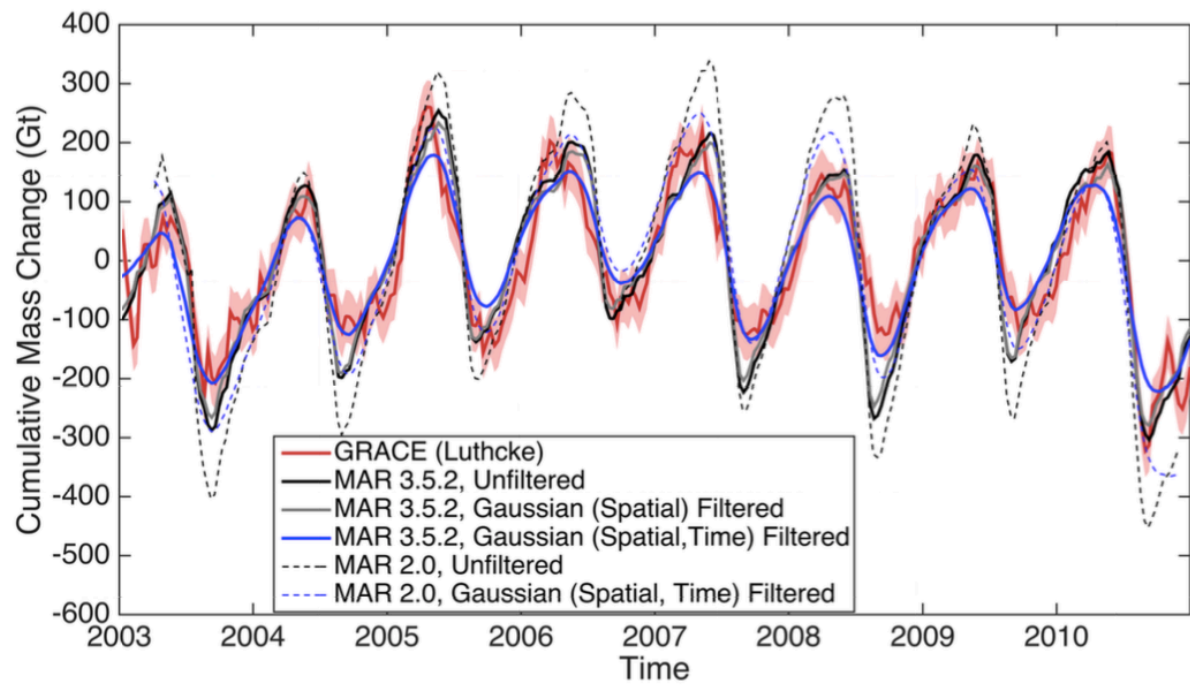

Figure S2: Same as Figure 4, but for MAR v3.5.2. Dashed lines show the MAR v2.0 detrended unfiltered and Gaussian-filtered timeseries for comparison with MAR v3.5.2.



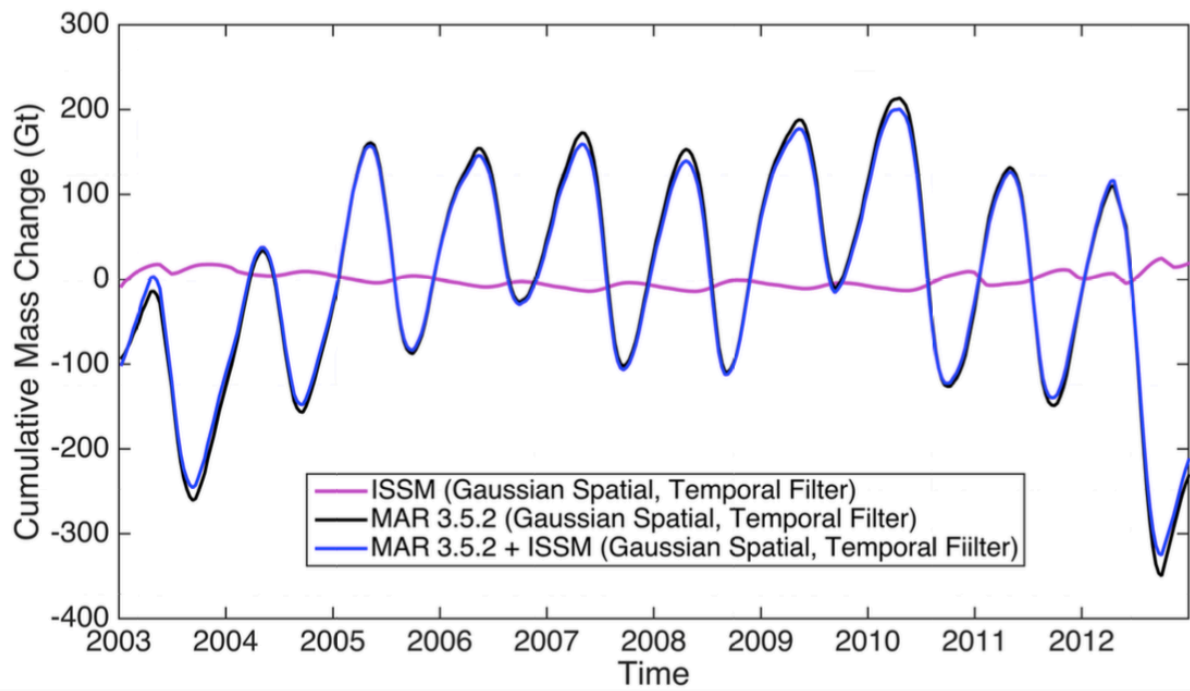

Figure S3: Detrended cumulative timeseries of Greenland mass change for MAR v3.5.2, ISSM, and MAR v3.5.2 + ISSM. Spatial and temporal Gaussian filtering has been applied to the model outputs.

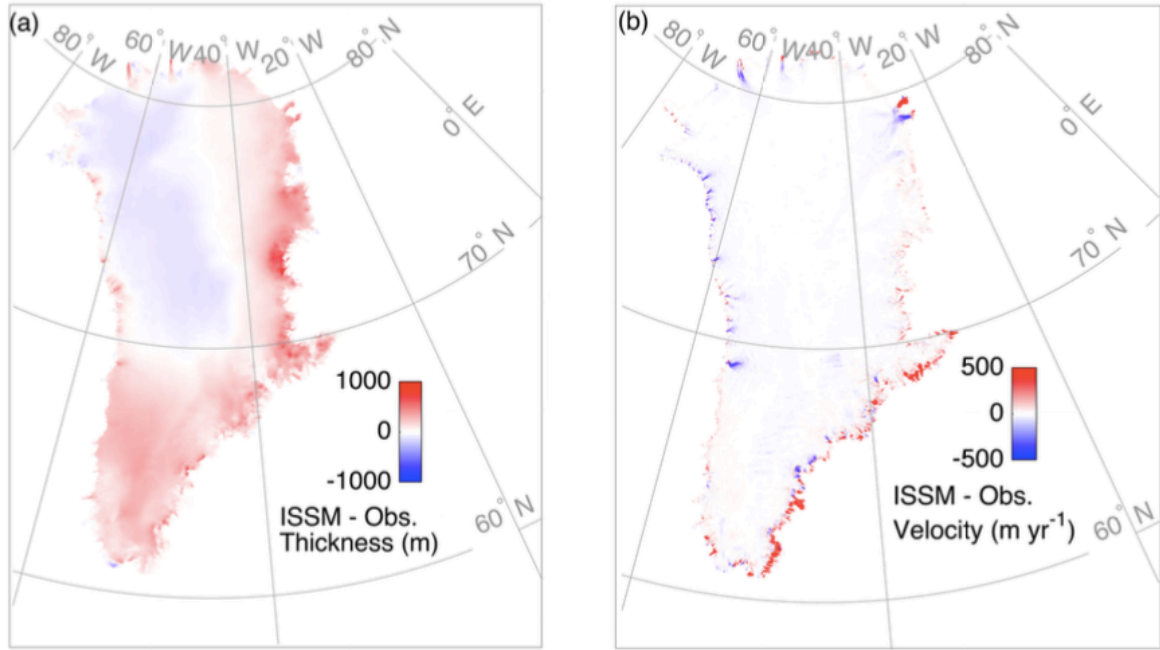

Figure S4: Difference between ISSM and observations for (a) Greenland Ice Sheet thickness (m), and (b) Annual ice velocities, for the year 2003. Thicknesses are obtained from Morlighem et al. (2015), and velocities are those of Rignot et al. (2012).

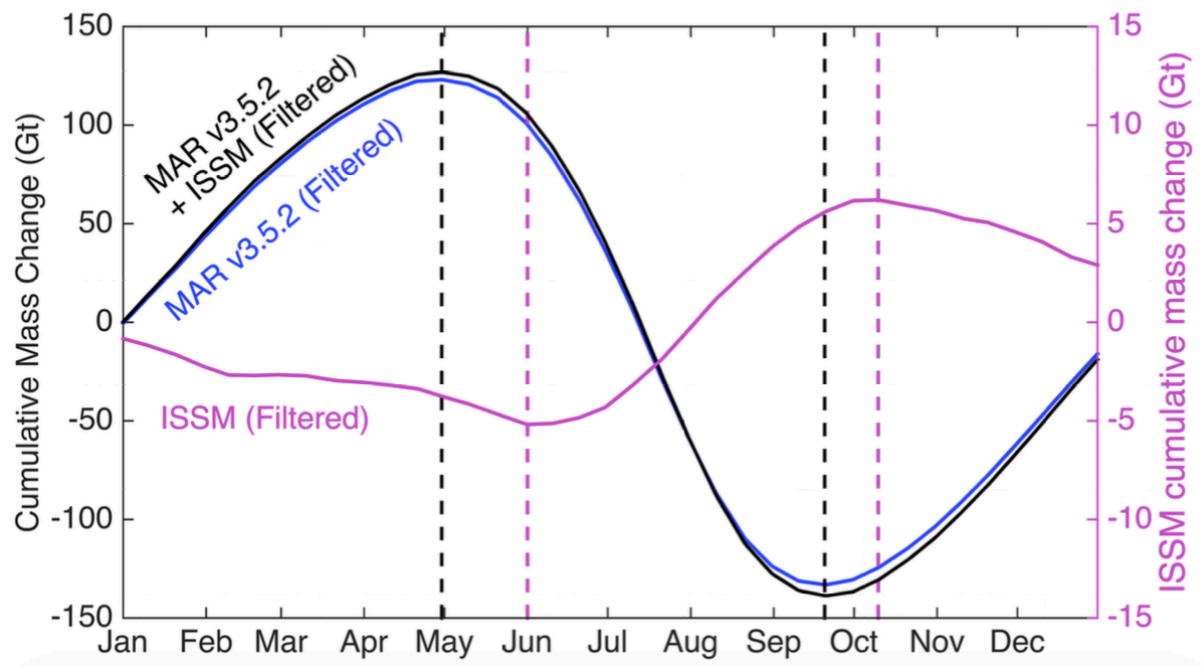

Figure S5: Same as Fig. 8b for MARv 3.5.2 + ISSM, MAR v3.5.2 and ISSM. Note a different axis is used for ISSM data.

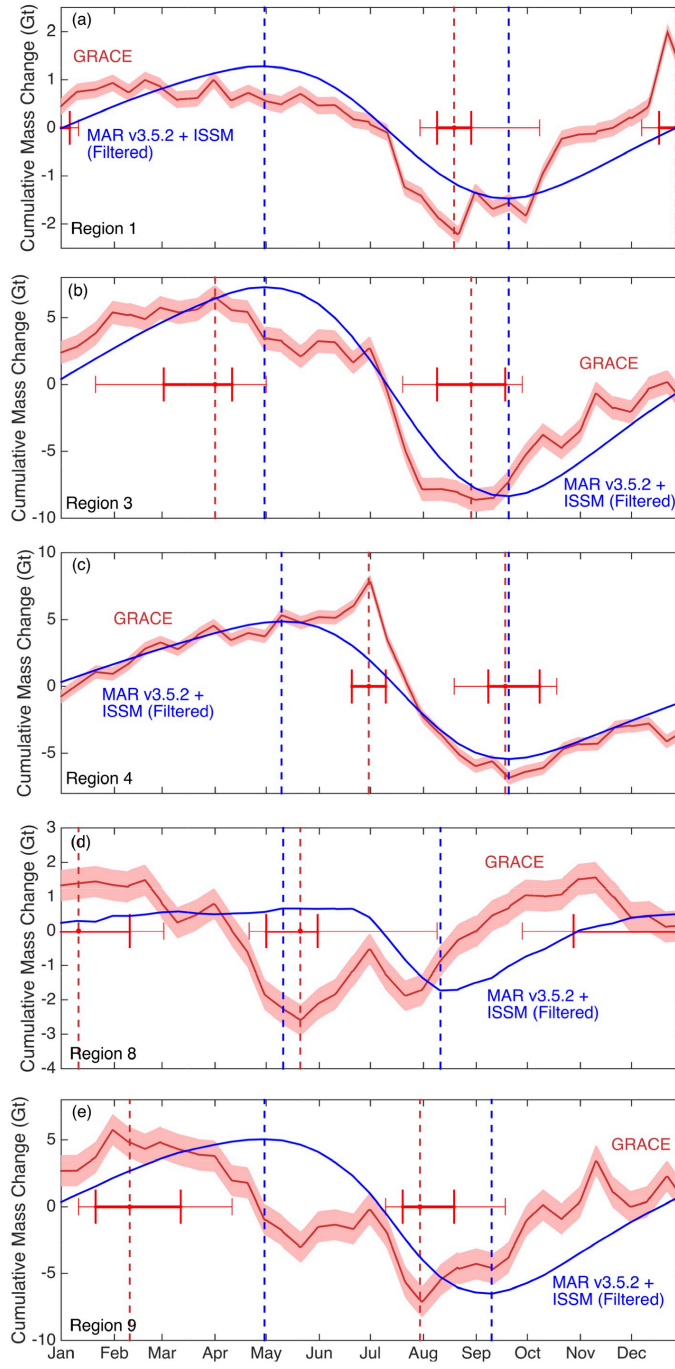

Figure S6: Same as Fig. 11b-e, but for additional regions shown in Fig. 11a: (a) Region 1, (b) Region 3, (c) Region 4, (d) Region 8, and (e) Region 9

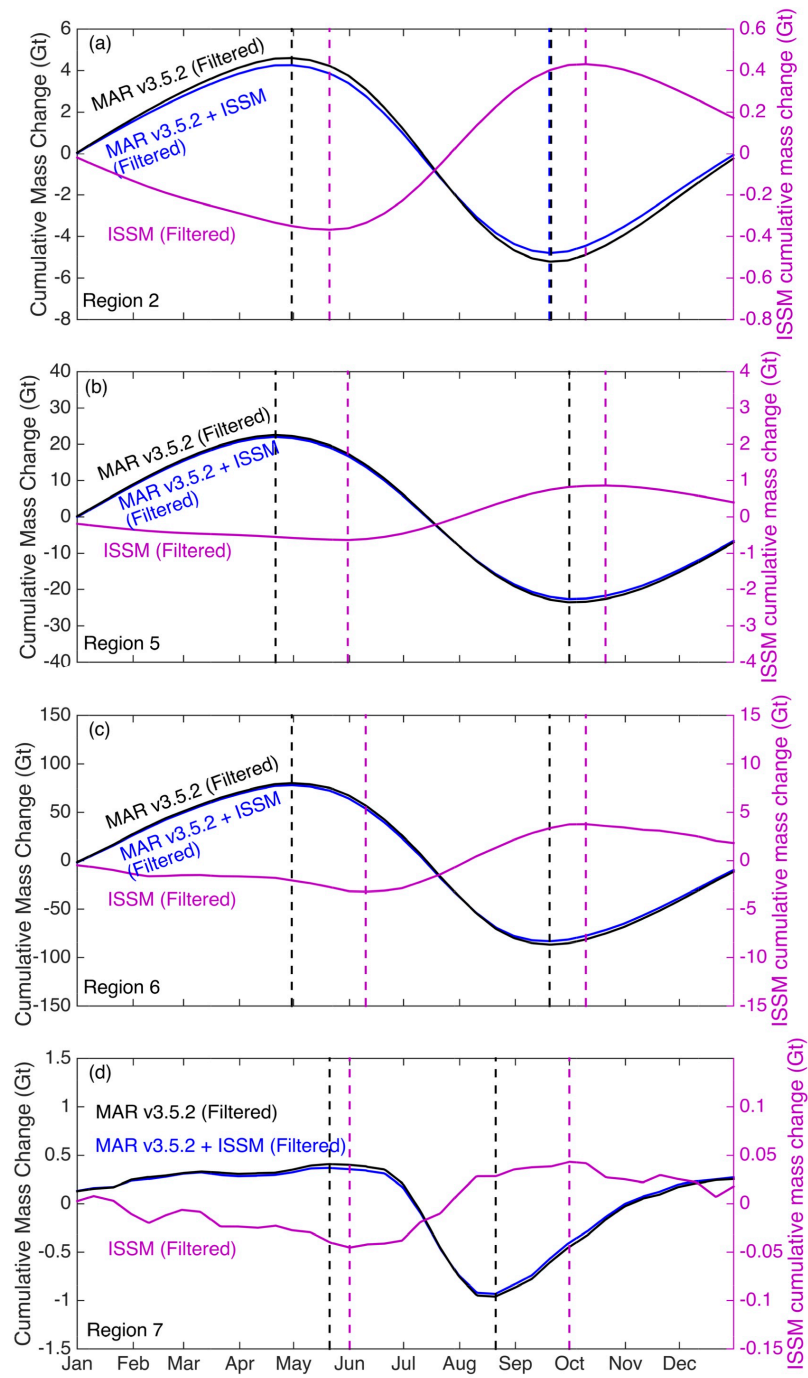

Figure S7: Same as Fig. 11b-e, but showing seasonal cycles for MAR v3.5.2, ISSM and MAR v3.5.2 + ISSM. Note the different axis for ISSM.

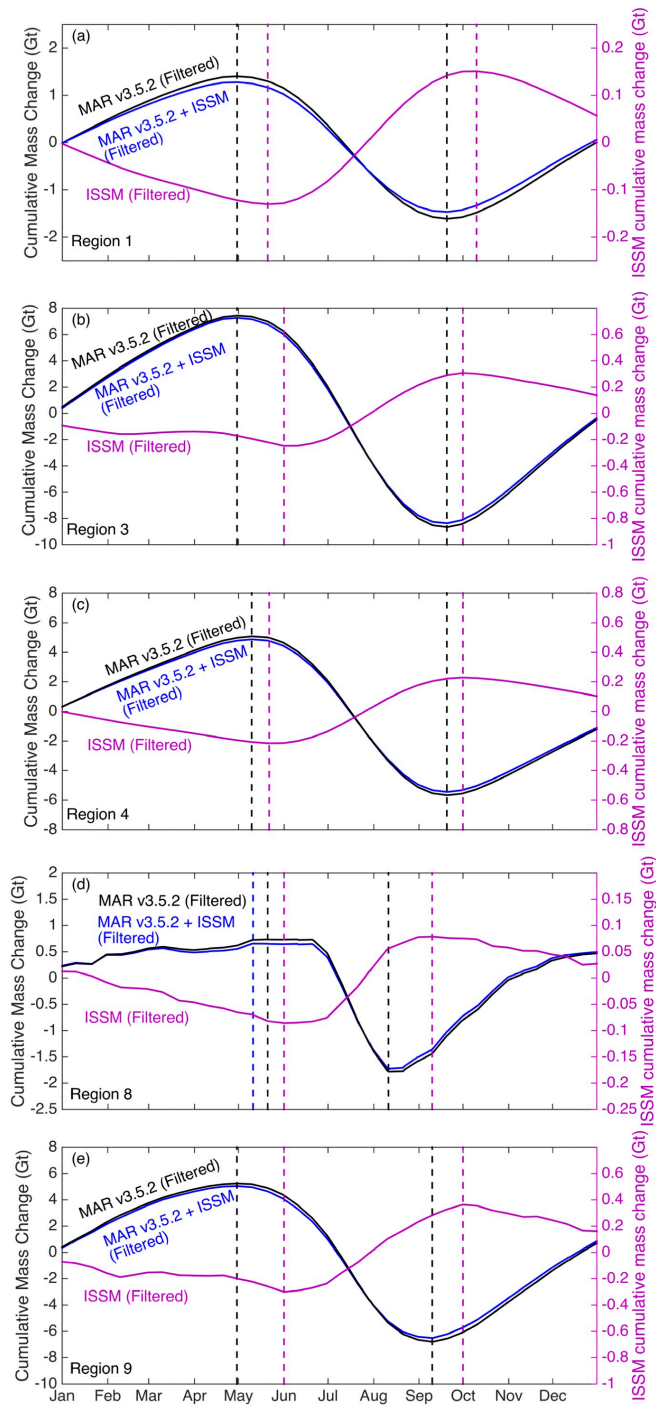

Figure S8: Same as Fig. S6, but showing seasonal cycles for MAR v3.5.2, ISSM and MAR v3.5.2 + ISSM. Note the different axis for ISSM.

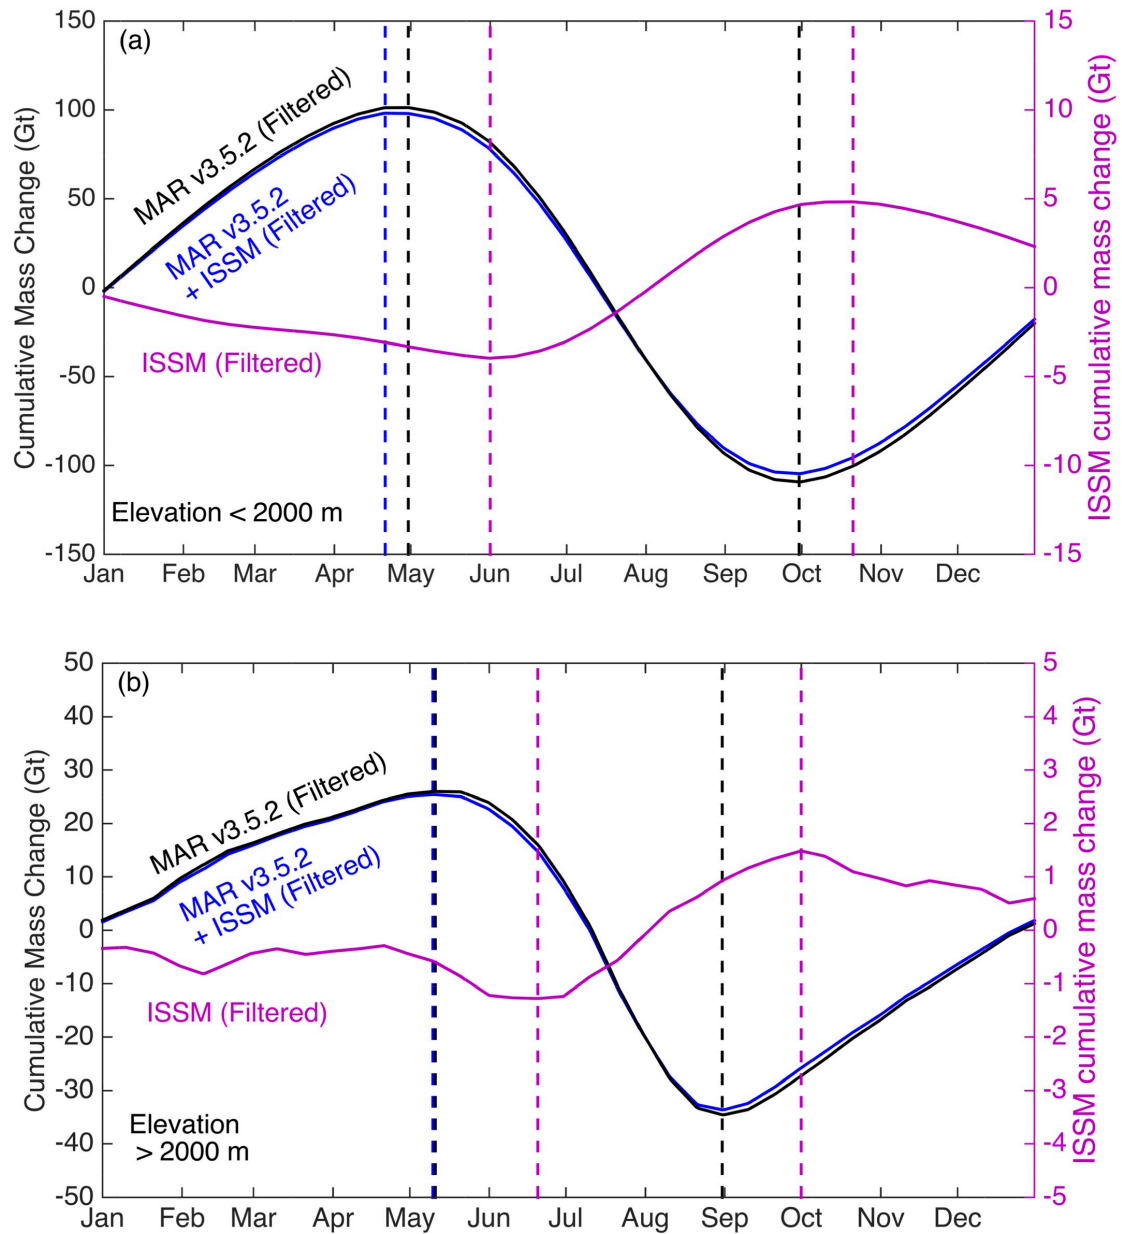

Figure S9: Same as Fig. 12, but showing seasonal cycles for MAR v3.5.2, ISSM and MAR v3.5.2 + ISSM. Note the different axis for ISSM.
